# Supplementary material
Source: ML conference proceedings conference paper supplement (https://proceedings.mlr.press/v31/trapeznikov13a.html)
Supplement: Supplementary file 1 [file trapeznikov13a-supp.pdf]

---

# Supervised Sequential Classification Under Budget Constraints: Supplementary Material

---

Kirill Trapeznikov  
Boston University

Venkatesh Saligrama  
Boston University

## 1 Proofs

**Proof of Theorem 1** To simplify our derivations, we assume uniform class prior probability:  $P_y [y = \hat{y}] = \frac{1}{c}$ ,  $\hat{y} = 1, \dots, C$ . However, our results can be easily modified to account for a non-uniform prior. The expected conditional risk can be solved optimally by a dynamic program, where a DP recursion is,

$$J_K(\mathbf{x}^K, S^K) = \min_{f^K} \mathbf{E}_y [S^K(\mathbf{x}^K) R_k(y, \mathbf{x}^K, f^K)] \quad (1)$$

$$J_k(\mathbf{x}^k, S^k) = \min_{f^k} \left\{ \mathbf{E}_y [S^k(\mathbf{x}^k) R_k(y, \mathbf{x}^k, f^k)] + \right. \quad (2)$$

$$\left. \mathbf{E}_{\mathbf{x}^{k+1} \dots \mathbf{x}^K} [J_{k+1}(\mathbf{x}^{k+1}, S^{k+1}) \mid \mathbf{x}^k] \right\} \quad (3)$$

Consider  $k$ th stage minimization,  $f^k$  can take  $C + 1$  possible values  $\{1, 2, \dots, C, r\}$  and  $J_k(\mathbf{x}^k, S^k)$  can be recast as an conditional expected risk minimization,

$$J_k(\mathbf{x}^k, S^k = 1) = \min_{f^k} \left\{ \underbrace{P_y [y \neq \hat{y} \mid \mathbf{x}^k]}_{f^k(\mathbf{x}^k) = \hat{y}}, \underbrace{\delta^k + \mathbf{E}_{\mathbf{x}^{k+1} \dots \mathbf{x}^K} [J_{k+1}(\mathbf{x}^{k+1}, 1) \mid \mathbf{x}^k]}_{f^k(\mathbf{x}^k) = r} \right\} \quad (4)$$

Define,

$$\tilde{\delta}(x^k) = \delta^{k+1} + \mathbf{E}_{\mathbf{x}^{k+1} \dots \mathbf{x}^K} [J_{k+1}(x^{k+1}, S^{k+1} = 1)]$$

and rewrite the conditional risk in 4,

$$f^k = \arg \min_f \left\{ \underbrace{1 - P_y [y = \hat{y} \mid \mathbf{x}^k]}_{f(\mathbf{x}^k) = \hat{y}}, \underbrace{\tilde{\delta}^k(\mathbf{x}^k)}_{f(\mathbf{x}^k) = r} \right\} \quad (5)$$

Reject is the optimal decision if,

$$\min_{\hat{y}} \{1 - P_y [y = \hat{y} \mid \mathbf{x}^k]\} \geq \tilde{\delta}^k(\mathbf{x}^k) \quad (6)$$

$$\max_{\hat{y}} \{P_y [y = \hat{y} \mid \mathbf{x}^k]\} \leq 1 - \tilde{\delta}^k(\mathbf{x}^k) \quad (7)$$

If reject is not the optimal strategy then a class is chosen to maximize the posterior probability:

$$f^k(\mathbf{x}^k) = \arg \max_{\hat{y} \in \{1, \dots, c\}} \{P_y [y = \hat{y} \mid \mathbf{x}^k]\} \quad (8)$$

which is exactly our claim.

**Proof of Lemma 2** Define an auxiliary variable corresponding to the error penalty term and absolute value of the maximizing codeword projection respectively:

$$e_i = \mathbf{1}_{[d^k(\mathbf{x}_i^k) \neq y_i]}, \quad z_i = \sigma_{d^k}(\mathbf{x}_i^k) \quad (9)$$

$$\tilde{R}_k^i(\cdot) = e_i \mathbf{1}_{[g(x^k) - z_i < 0]} + \tilde{\delta}_i^k \mathbf{1}_{[g(x^k) - z_i \geq 0]} \quad (10)$$

$$= e_i \mathbf{1}_{[g(x^k) - z_i < 0]} + \tilde{\delta}_i^k \{1 - \mathbf{1}_{[g(x^k) - z_i < 0]}\} \quad (11)$$

$$= \{e_i - \tilde{\delta}_i^k\} \mathbf{1}_{[g(x^k) - z_i < 0]} + \tilde{\delta}_i^k \quad (12)$$

Define weights  $w_i = e_i - \tilde{\delta}_i^k$  and drop the  $\tilde{\delta}_i^k$  term since it does not depend on  $g(\cdot)$ . Our goal is to minimize  $\sum S_i^k \tilde{R}_k^i$  over  $g$ . We will split the summation into two sets:

$$= \sum_{w_i \geq 0} S_i^k w_i \mathbf{1}_{[(g(\mathbf{x}_i^k) - z_i) \leq 0]} + \sum_{w_i < 0} S_i^k w_i \mathbf{1}_{[(g(\mathbf{x}_i^k) - z_i) \leq 0]} \quad (13)$$

$$= \sum_{w_i \geq 0} S_i^k w_i \mathbf{1}_{[(g(\mathbf{x}_i^k) - z_i) \leq 0]} + \sum_{w_i < 0} S_i^k w_i \left\{1 - \mathbf{1}_{[(g(\mathbf{x}_i^k) - z_i) > 0]}\right\} \quad (14)$$

If discard the constant term  $\sum_{w_i < 0} S_i^k w_i$  and introduce pseudo labels  $b_i = \begin{cases} +1, & w_i \geq 0 \\ -1, & w_i < 0 \end{cases}$  then,

$$\arg \min_g \sum_{i=1}^N S_i^k \tilde{R}_k^i = \arg \min_g \sum_{i=1}^N S_i^k |w_i| \mathbf{1}_{[b_i(g(\mathbf{x}_i^k) - z_i) \leq 0]} \quad (15)$$

**Proof of Theorem 3** At each stage the reject decision can be expressed in terms of three boolean decisions:

$$\mathbf{1}_{[|h^k(\mathbf{x}^k)| - g^k(\mathbf{x}^k) \leq 0]} = \underbrace{\mathbf{1}_{[h^k(\mathbf{x}^k) > 0]}}_{\text{Decision 1}} \underbrace{\mathbf{1}_{[h^k(\mathbf{x}^k) - g^k(\mathbf{x}^k) \leq 0]}}_{\text{Decision 2}} + \underbrace{\mathbf{1}_{[h^k(\mathbf{x}^k) \leq 0]}}_{\text{Not Decision 1}} \underbrace{\mathbf{1}_{[-h^k(\mathbf{x}^k) - g^k(\mathbf{x}^k) \leq 0]}}_{\text{Decision 3}} \quad (16)$$

If the rejectors ( $g^k \in \mathcal{G}^k$ ) and stage classifiers ( $h^k \in \mathcal{H}^k$ ) belong to families with finite VC dimensions then the complexity of Decision 2 and Decision 3 is  $\mathcal{VC}[\mathcal{G}^k] + \mathcal{VC}[\mathcal{H}^k]$

The system classifier,  $F$ , is composed of  $K$  stages. Each of the first  $K - 1$  stages can be expressed as a boolean function of 3 boolean decisions. The last stage is a single boolean decision. So the output  $F$  can be expressed as a boolean function of  $3(K - 1) + 1 = 3K - 2$  functions. We know the VC dimension for each of the functions. Using this fact and Lemma 2 in [?] we obtain our result.

## 2 Implementation Details

For large datasets ( $N > 1000$ ), we split them 50/10/40% into train, validation and test sets. The performance reported is on the test set. For smaller datasets ( $N < 1000$ ), we perform 50 random 70/10/20% splits and report the average performance over the trials. Each subproblem reduces to minimizing a weighted binary error problem with respect to a logistic loss. Polynomial kernel classifier of degree  $q$  is parametrized by a vector  $\mathbf{a}$ :

$$h(x) = \sum_{i=1}^N a_i (\mathbf{x}_i^T \mathbf{x} + 1)^q$$

The optimization over the polynomial kernel classifier is performed using newton gradient descent method. Table 1 shows the degree of polynomial kernels used in our simulations.

| Dataset    | $\mathcal{H}^1$ | $\mathcal{G}^1$ | $\mathcal{H}^2$ | $\mathcal{G}^2$ | $\mathcal{H}^3$ | $\mathcal{G}^3$ | $\mathcal{H}^4$ |
|------------|-----------------|-----------------|-----------------|-----------------|-----------------|-----------------|-----------------|
| synthetic  | 2               | 2               | 2               |                 |                 |                 |                 |
| mam        | 2               | 0               | 2               |                 |                 |                 |                 |
| pima       | 2               | 0               | 2               | 0               | 2               |                 |                 |
| threat     | 5               | 5               | 5               | 5               | 5               |                 |                 |
| coverttype | 1               | 1               | 1               | 1               | 1               |                 |                 |
| letter     | 7               | 2               | 7               | 2               | 7               |                 |                 |
| mnist      | 1               | 1               | 1               | 1               | 1               | 1               | 1               |
| landsat    | 3               | 2               | 3               | 2               | 3               | 2               | 3               |

Table 1: Stage Complexity: we use polynomial kernel classifiers. This table displays the degree of the polynomial kernel used at each stage for the rejector and the stage classifier
